# Supplementary material
Source: PubMed Central journal article supplement (PMC9927632)

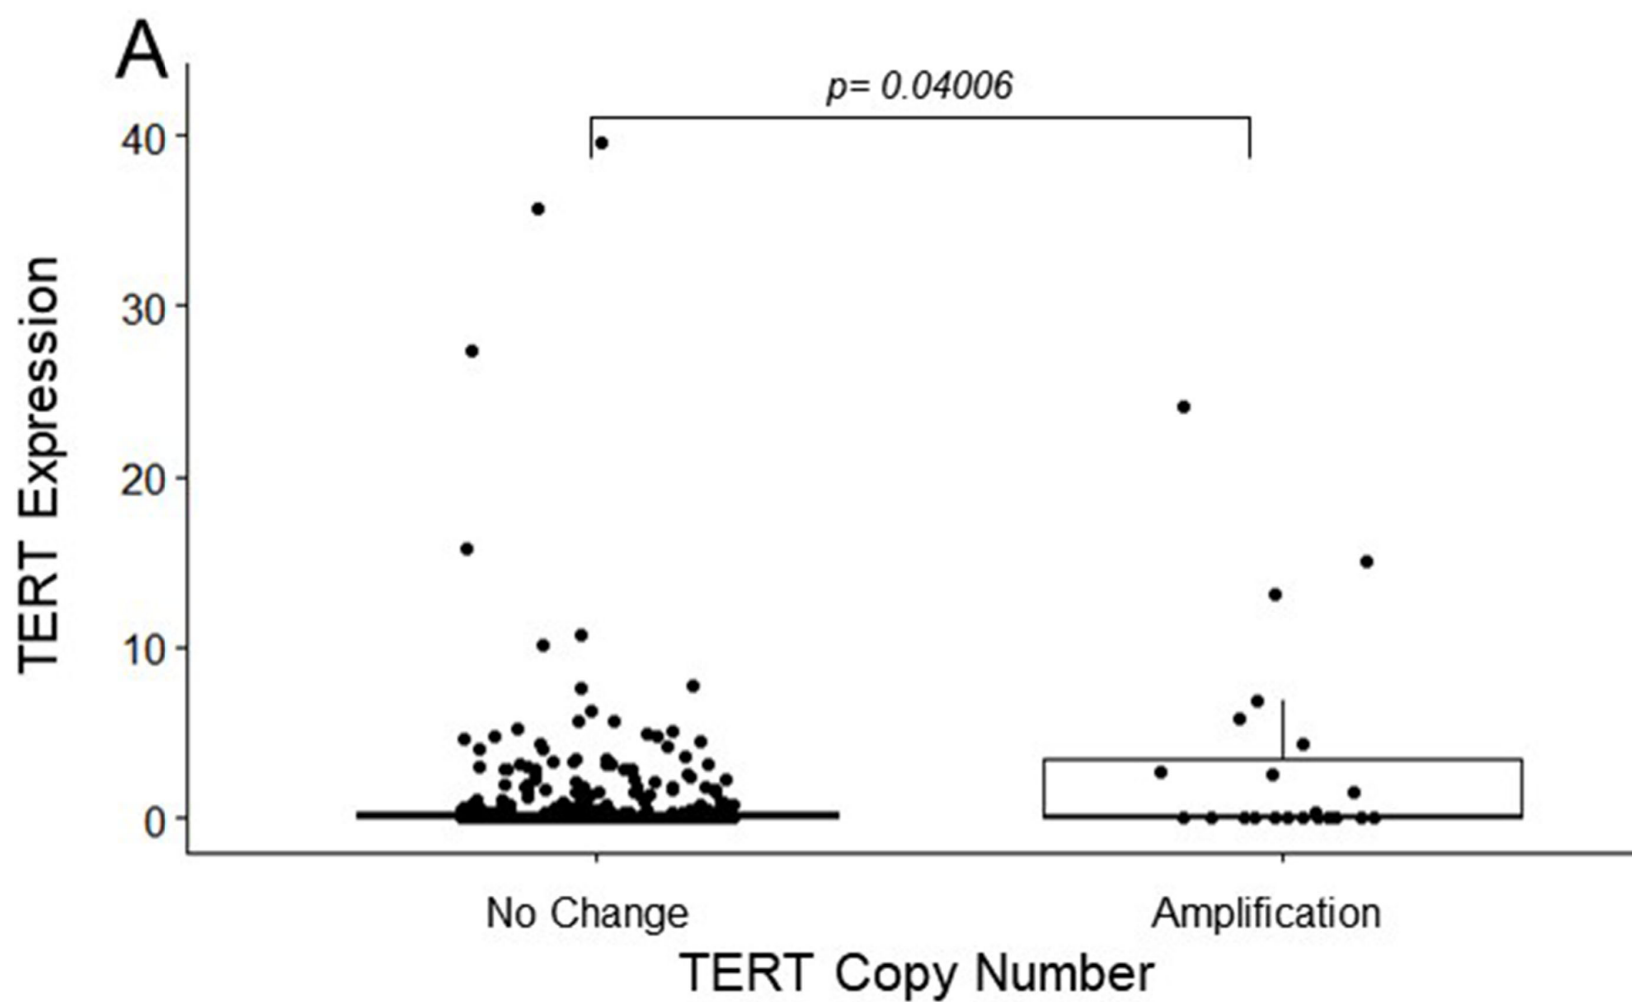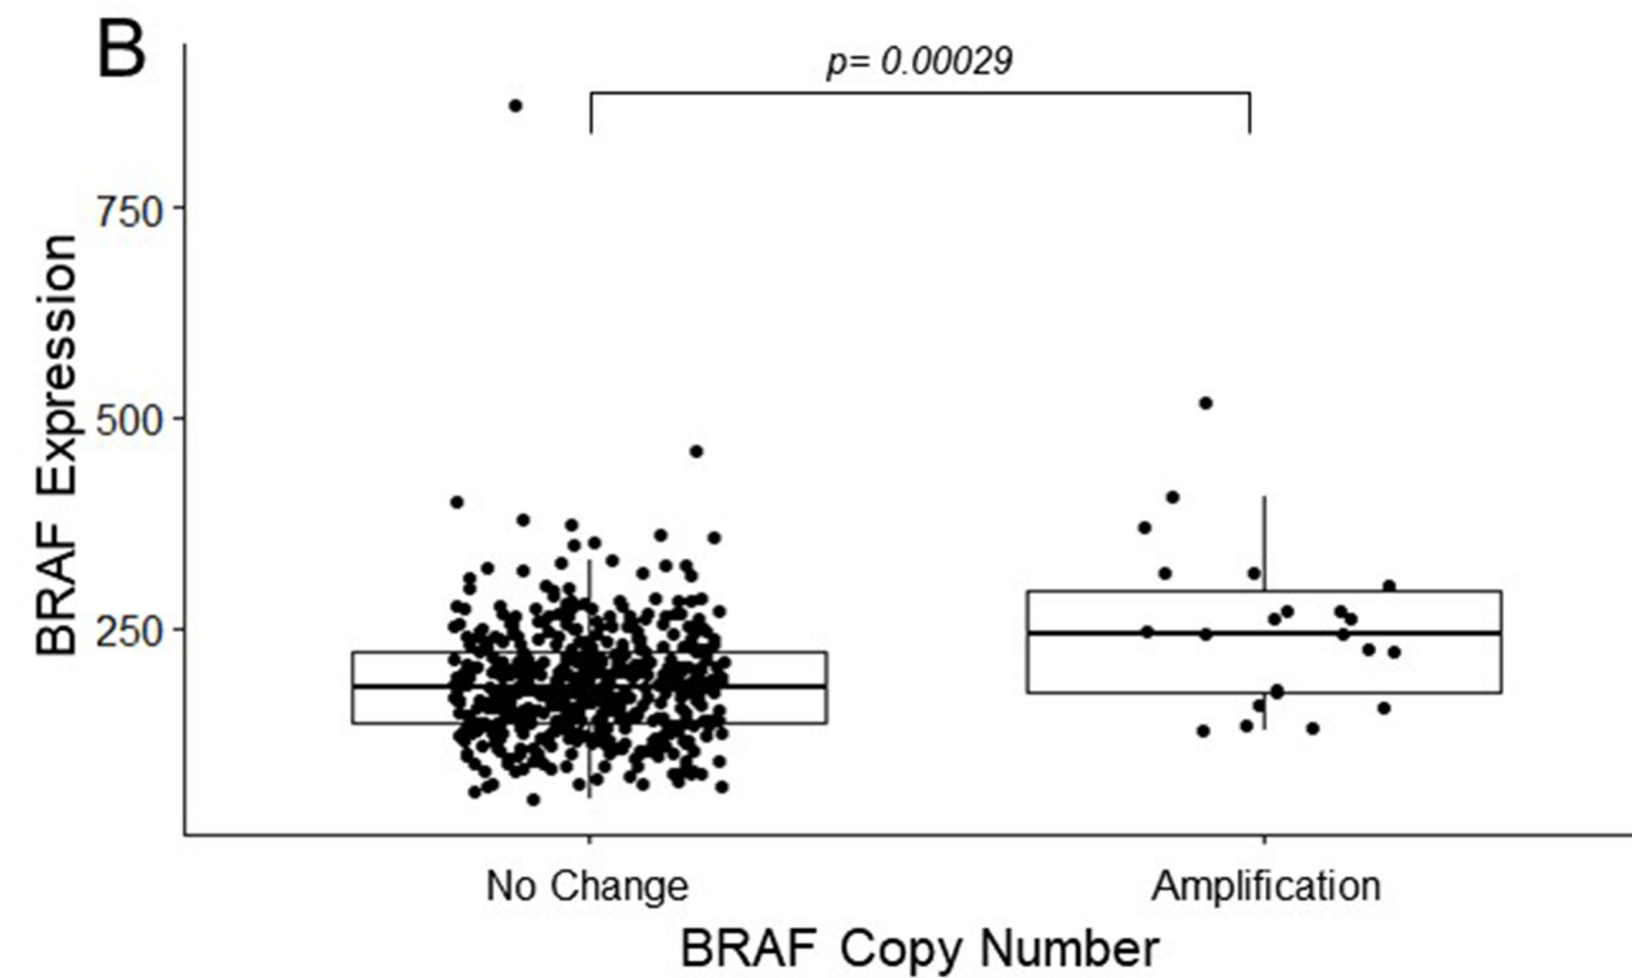

Supplement: NIHMS1861509-supplement-Supple_fig_1.pdf [file NIHMS1861509-supplement-Supple_fig_1.pdf]
